# Supplementary material
Source: MDPI journal article supplement (https://www.mdpi.com/1999-4907/8/4/130)
Supplement: s1 [file s1]

**Supplementary Table 1.** Pre-test results of soil basal respiration.

| average | 24 | 248 | 57 | 60 | 71 | Plot number |
| --- | --- | --- | --- | --- | --- | --- |
|  | 125.378889 | 125.414754 | 125.391944 | 125.356389 | 125.320278 | X |
|  | 43.993 | 43.85 | 43.862 | 43.865 | 43.879 | Y |
| 1.60 | 1.08 | 1.55 | 1.76 | 2.22 | 1.41 | Day 1  (μmol/m2/s) |
| 1.35 | 1.21 | 1.73 | 1.44 | 1.36 | 1.03 | Day 2  (μmol/m2/s) |
| 1.45 | 0.98 | 1.54 | 1.27 | 2.08 | 1.37 | Day 3  (μmol/m2/s) |
| 1.34 | 0.91 | 1.38 | 1.30 | 1.55 | 1.54 | Day 4  (μmol/m2/s) |
| 1.11 | 0.78 | 1.05 | 1.05 | 1.39 | 1.29 | Day 5  (μmol/m2/s) |
| 1.07 | 0.77 | 1.11 | 0.97 | 1.40 | 1.11 | Day 6  (μmol/m2/s) |
| 1.00 | 0.76 | 1.14 | 0.81 | 1.12 | 1.17 | Day 7  (μmol/m2/s) |
| 0.96 | 0.71 | 1.11 | 0.82 | 1.08 | 1.09 | Day 8  (μmol/m2/s) |
| 0.91 | 0.69 | 1.09 | 0.77 | 0.99 | 1.00 | Day 9  (μmol/m2/s) |
| 1.00 | 0.68 | 1.20 | 0.80 | 1.20 | 1.14 | Day 10  (μmol/m2/s) |
| 1.01 | 0.79 | 1.30 | 0.82 | 1.25 | 0.87 | Day 11  (μmol/m2/s) |
| 0.93 | 0.50 | 1.11 | 0.79 | 1.10 | 1.13 | Day 12  (μmol/m2/s) |
| 0.97 | 0.66 | 1.19 | 0.83 | 1.01 | 1.14 | Day 13  (μmol/m2/s) |
| 0.98 | 0.68 | 1.36 | 0.68 | 1.22 | 0.98 | Day 14  (μmol/m2/s) |
| 1.01 | 0.70 | 1.29 | 0.77 | 1.17 | 1.10 | Day 15  (μmol/m2/s) |


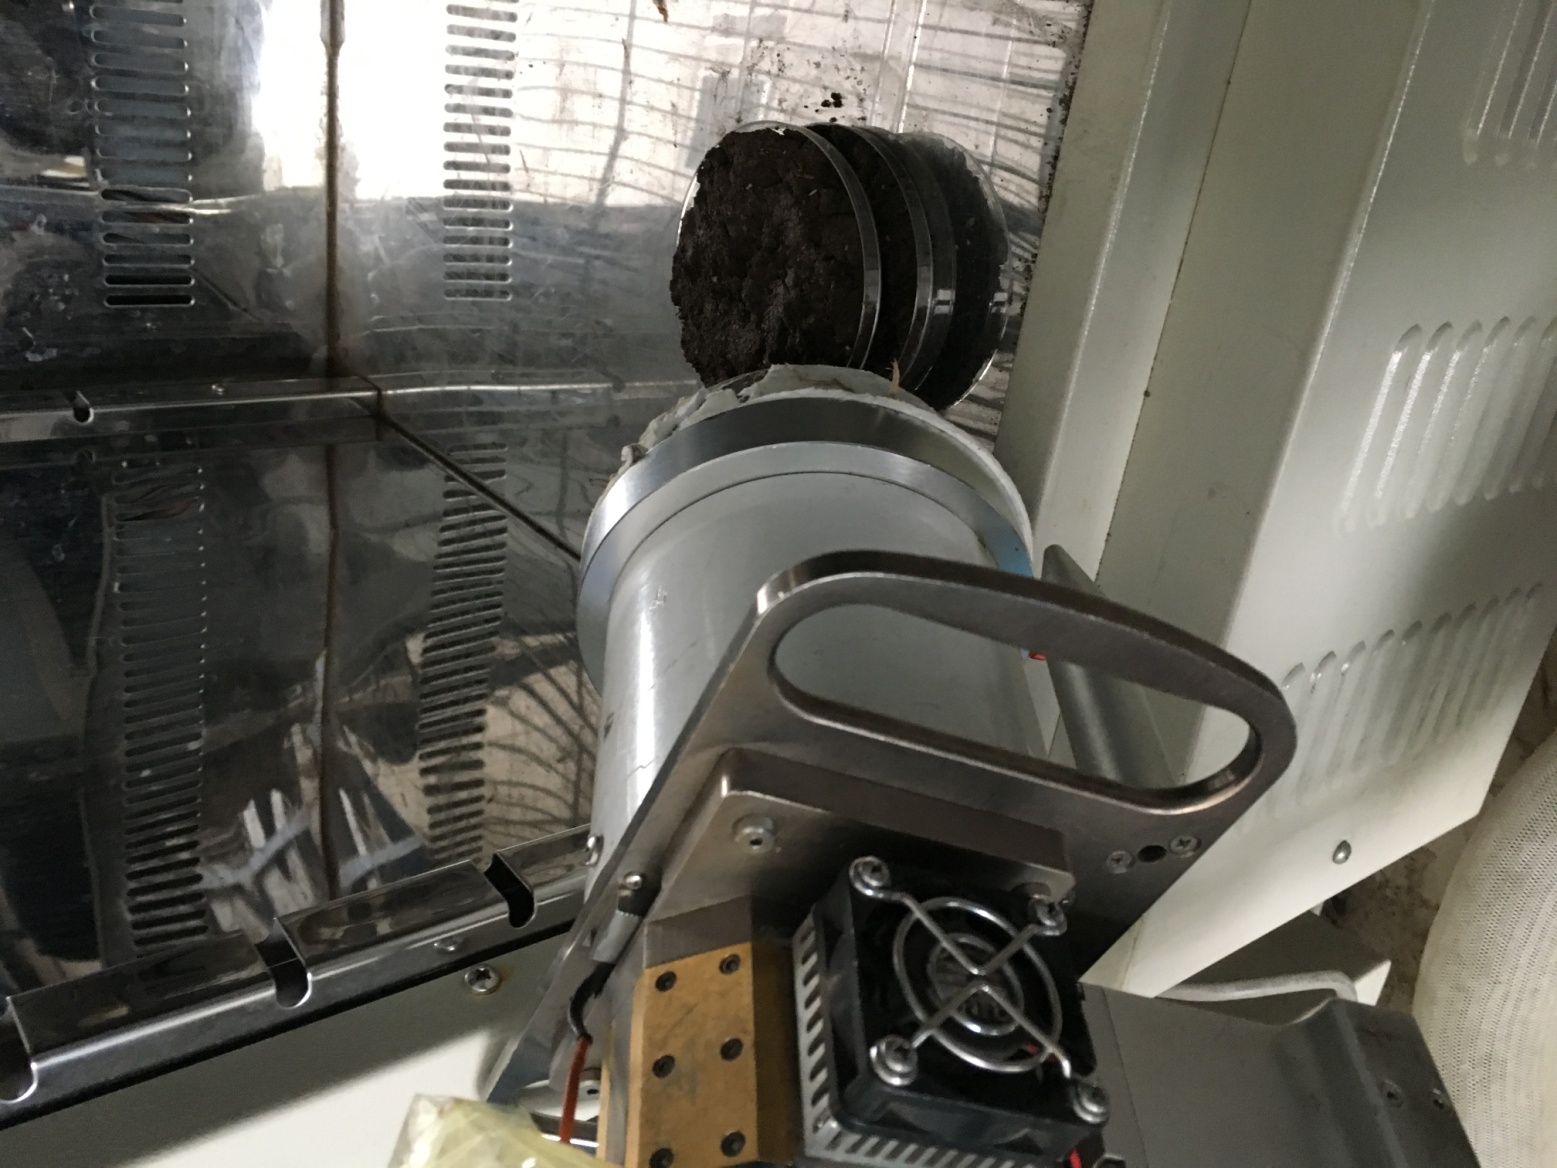

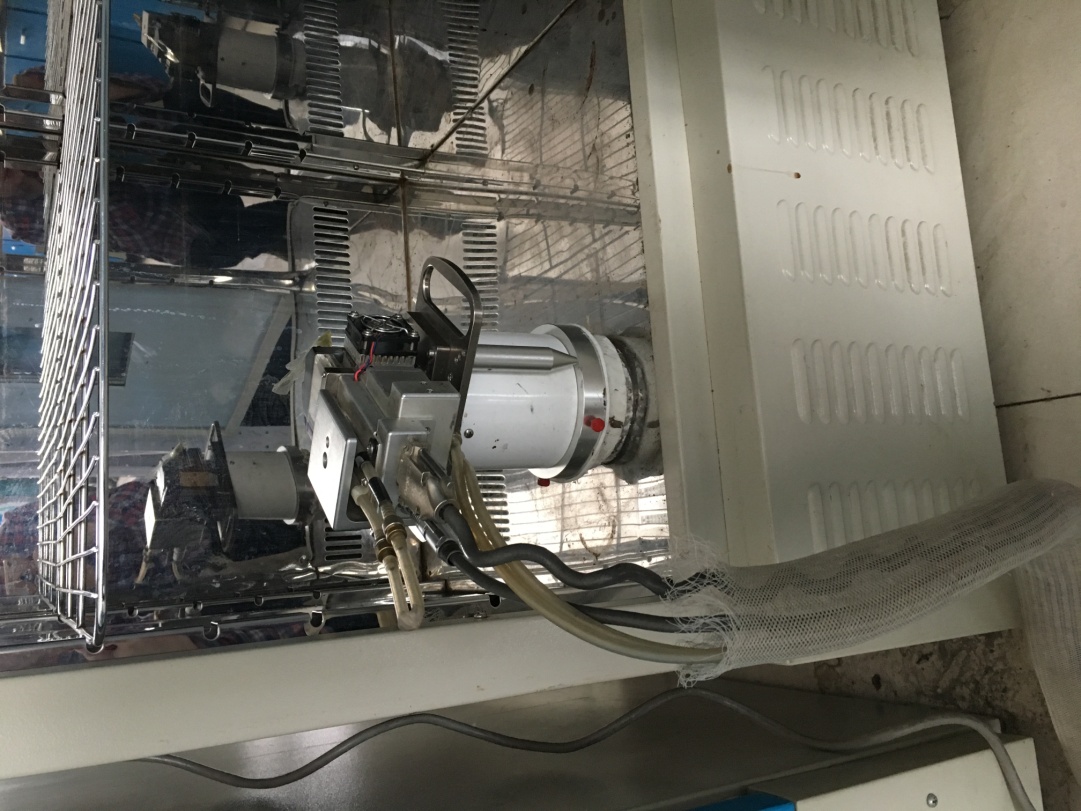

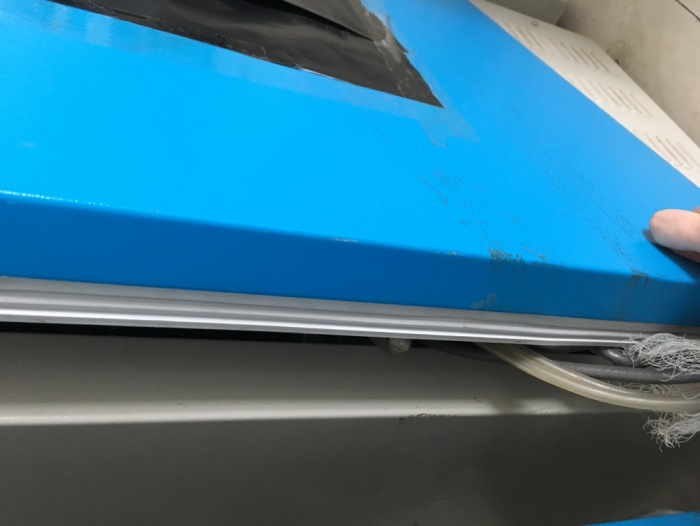


**Supplementary figure 1.** Soil respiration rate measurement
